# Supplementary material for: Detection and surveillance of SARS-CoV-2 genomic variants in wastewater
Source: bioRxiv or medRxiv preprint supplement (doi:10.1101/2021.01.08.21249379), 2021-07-15
Supplement: Supplementary file [file media-1.pdf]

EPI\_ISL\_768304, EPI\_ISL\_768305, EPI\_ISL\_768306, EPI\_ISL\_768307, EPI\_ISL\_768308, EPI\_ISL\_768309, EPI\_ISL\_768310, EPI\_ISL\_768311, EPI\_ISL\_768312, EPI\_ISL\_768313, EPI\_ISL\_768314, EPI\_ISL\_768315, EPI\_ISL\_768316, EPI\_ISL\_768317, EPI\_ISL\_768318, EPI\_ISL\_768319, EPI\_ISL\_768320, EPI\_ISL\_768321, EPI\_ISL\_768322, EPI\_ISL\_768323

see above

Viollier AG

Department of Biosystems Science and Engineering,  
ETH Zürich

Chaoran Chen, Sarah Nadeau, Catharine Aquino, Ivan Topolsky, Philipp Jablonski, Lara Fuhrmann, David Dreifuss, Katharina Jahn, Andreia Cabral de Gouvea, Maria Domenica Moccia, Simon Grüter, Timothy Sykes, Lennart Opitz, Griffin White, Laura Neff, Doris Popovic, Andrea Patrignani, Jay Tracy, Ralph Schlapbach, Christiane Beckmann, Maurice Redondo, Olivier Kobel, Christoph Noppen, Sophie Seidel, Noemie Santamaria de Souza, Niko Beerenwinkel, Tanja Stadler
